# Supplementary material
Source: publisher figshare collection journal article supplement (https://asha.figshare.com/articles/dataset/_/28304384)
Supplement: Supplementary file 1 [file 1]

**Supplemental Material S1.** Average perceived emotion ratings (%) by talker and speaking style for each of the following emotions: disgust, fear, happiness, sadness, and neutral.

**Table S1.** Average disgust ratings (%) by talker and speaking style.

| <b>Talker ID</b> | <b>CON</b> | <b>CL</b> | <b>Diff</b> |
|------------------|------------|-----------|-------------|
| F01              | 8.79       | 10.16     | 1.37        |
| F02              | 4.67       | 9.89      | 5.22        |
| F03              | 6.59       | 6.04      | -0.55       |
| F04              | 5.22       | 4.67      | -0.55       |
| F05              | 0.55       | 21.15     | 20.60       |
| F06              | 1.37       | 9.89      | 8.52        |
| F07              | 10.71      | 16.48     | 5.77        |
| F08              | 6.59       | 18.41     | 11.81       |
| FX9              | 7.69       | 15.09     | 7.40        |
| F10              | 7.42       | 11.54     | 4.12        |
| F11 <sup>2</sup> | 4.95       | 16.21     | 11.26       |
| F12              | 2.75       | 8.24      | 5.49        |
| F13              | 7.69       | 16.21     | 8.52        |
| F14 <sup>3</sup> | 0.55       | 5.49      | 4.95        |
| F15              | 8.79       | 9.62      | 0.82        |
| F16              | 11.54      | 17.03     | 5.49        |
| F17 <sup>1</sup> | 28.85      | 29.12     | 0.27        |
| F18              | 14.29      | 14.29     | 0.00        |
| F19              | 25.32      | 23.90     | -1.42       |
| F20              | 3.30       | 13.19     | 9.89        |
| F21              | 8.52       | 13.46     | 4.95        |
| MX1              | 2.47       | 8.24      | 5.77        |
| MX2              | 6.32       | 17.03     | 10.71       |
| M03              | 1.92       | 17.03     | 15.11       |
| M04              | 5.77       | 12.64     | 6.87        |
| M05              | 3.57       | 13.46     | 9.89        |
| M06              | 4.67       | 24.45     | 19.78       |
| M07              | 5.22       | 9.62      | 4.40        |
| M08              | 5.77       | 15.66     | 9.89        |
| M09              | 10.71      | 11.81     | 1.10        |
| M10              | 2.75       | 10.16     | 7.42        |

|               |             |              |       |
|---------------|-------------|--------------|-------|
| M11           | 2.75        | 20.88        | 18.13 |
| M12           | 2.47        | 5.49         | 3.02  |
| M13           | 1.65        | 11.26        | 9.62  |
| M14           | 2.75        | 7.97         | 5.22  |
| M15           | 9.07        | 16.48        | 7.42  |
| M16           | 3.30        | 3.30         | 0.00  |
| M17           | 3.30        | 7.69         | 4.40  |
| M18           | 1.10        | 10.44        | 9.34  |
| M19           | 9.62        | 22.25        | 12.64 |
| M20           | 9.62        | 17.58        | 7.97  |
| <i>M (SD)</i> | 6.61 (5.77) | 13.50 (5.84) | 6.89  |

**Table S2.** Average fear ratings (%) by talker and speaking style.

| <b>Talker ID</b> | <b>CON</b> | <b>CL</b> | <b>Diff</b> |
|------------------|------------|-----------|-------------|
| F01              | 3.02       | 10.16     | 7.14        |
| F02 <sup>1</sup> | 17.03      | 5.49      | -11.54      |
| F03              | 2.20       | 1.10      | -1.10       |
| F04              | 5.77       | 3.57      | -2.20       |
| F05              | 3.30       | 4.12      | 0.82        |
| F06              | 1.92       | 1.37      | -0.55       |
| F07              | 7.97       | 7.42      | -0.55       |
| F08              | 3.02       | 1.65      | -1.37       |
| FX9              | 2.47       | 2.66      | 0.19        |
| F10              | 1.10       | 1.65      | 0.55        |
| F11 <sup>2</sup> | 4.12       | 1.92      | -2.20       |
| F12              | 5.22       | 1.65      | -3.57       |
| F13              | 3.57       | 5.22      | 1.65        |
| F14              | 9.07       | 7.97      | -1.10       |
| F15              | 1.92       | 0.82      | -1.10       |
| F16              | 1.78       | 0.55      | -1.23       |
| F17              | 1.92       | 1.10      | -0.82       |
| F18              | 6.87       | 3.57      | -3.30       |
| F19              | 3.21       | 0.82      | -2.38       |
| F20              | 1.10       | 2.20      | 1.10        |

|                  |             |             |       |
|------------------|-------------|-------------|-------|
| F21              | 0.00        | 0.82        | 0.82  |
| MX1              | 4.67        | 1.92        | -2.75 |
| MX2 <sup>3</sup> | 0.27        | 0.27        | 0.00  |
| M03              | 8.52        | 1.65        | -6.87 |
| M04              | 4.12        | 3.02        | -1.10 |
| M05              | 5.49        | 2.47        | -3.02 |
| M06              | 3.85        | 0.82        | -3.02 |
| M07              | 0.27        | 2.47        | 2.20  |
| M08              | 1.10        | 0.82        | -0.27 |
| M09              | 0.55        | 0.55        | 0.00  |
| M10              | 0.55        | 4.12        | 3.57  |
| M11              | 0.82        | 0.82        | 0.00  |
| M12              | 5.49        | 2.47        | -3.02 |
| M13              | 0.55        | 0.55        | 0.00  |
| M14              | 1.92        | 1.37        | -0.55 |
| M15              | 0.82        | 0.55        | -0.27 |
| M16              | 2.75        | 1.37        | -1.37 |
| M17              | 1.65        | 1.10        | -0.55 |
| M18              | 1.92        | 0.00        | -1.92 |
| M19              | 2.47        | 1.37        | -1.10 |
| M20              | 1.37        | 0.27        | -1.10 |
| <i>M (SD)</i>    | 3.31 (3.19) | 2.29 (2.23) | -1.02 |

**Table S3.** Average happiness ratings (%) by talker and speaking style.

| <b>Talker ID</b> | <b>CON</b> | <b>CL</b> | <b>Diff</b> |
|------------------|------------|-----------|-------------|
| F01              | 32.97      | 3.85      | -29.12      |
| F02              | 23.90      | 4.40      | -19.51      |
| F03              | 9.62       | 10.16     | 0.55        |
| F04              | 29.12      | 34.89     | 5.77        |
| F05              | 46.15      | 3.30      | -42.86      |
| F06              | 47.53      | 27.75     | -19.78      |
| F07              | 5.77       | 0.55      | -5.22       |
| F08              | 33.52      | 1.37      | -32.14      |
| FX9              | 33.52      | 7.40      | -26.12      |

|                  |               |             |        |
|------------------|---------------|-------------|--------|
| F10              | 2.75          | 1.92        | -0.82  |
| F11 <sup>2</sup> | 9.34          | 2.75        | -6.59  |
| F12              | 20.60         | 9.07        | -11.54 |
| F13              | 1.37          | 4.40        | 3.02   |
| F14              | 35.16         | 29.12       | -6.04  |
| F15              | 20.33         | 9.89        | -10.44 |
| F16              | 12.13         | 0.27        | -11.86 |
| F17              | 1.10          | 0.82        | -0.27  |
| F18              | 11.26         | 2.47        | -8.79  |
| F19              | 11.54         | 2.20        | -9.34  |
| F20              | 12.09         | 5.22        | -6.87  |
| F21              | 27.20         | 19.78       | -7.42  |
| MX1              | 56.04         | 35.16       | -20.88 |
| MX2              | 3.02          | 2.47        | -0.55  |
| M03              | 18.13         | 3.85        | -14.29 |
| M04              | 6.87          | 3.85        | -3.02  |
| M05              | 22.25         | 9.62        | -12.64 |
| M06              | 18.13         | 5.77        | -12.36 |
| M07              | 14.56         | 7.97        | -6.59  |
| M08 <sup>3</sup> | 0.55          | 1.37        | 0.82   |
| M09              | 2.75          | 2.20        | -0.55  |
| M10              | 0.55          | 21.15       | 20.60  |
| M11              | 7.14          | 5.77        | -1.37  |
| M12              | 14.01         | 3.02        | -10.99 |
| M13              | 32.69         | 11.26       | -21.43 |
| M14              | 14.84         | 8.52        | -6.32  |
| M15              | 13.19         | 9.62        | -3.57  |
| M16              | 16.21         | 18.13       | 1.92   |
| M17 <sup>1</sup> | 16.21         | 9.89        | -6.32  |
| M18              | 27.75         | 14.56       | -13.19 |
| M19              | 3.02          | 6.32        | 3.30   |
| M20              | 0.82          | 4.95        | 4.12   |
| <i>M (SD)</i>    | 17.46 (13.99) | 8.95 (9.15) | -8.50  |

**Table S4.** Average sadness ratings (%) by talker and speaking style.

| <b>Talker ID</b> | <b>CON</b> | <b>CL</b> | <b>Diff</b> |
|------------------|------------|-----------|-------------|
| F01              | 12.64      | 1.10      | -11.54      |
| F02              | 0.55       | 1.37      | 0.82        |
| F03              | 12.36      | 12.36     | 0.00        |
| F04              | 2.75       | 0.55      | -2.20       |
| F05              | 7.14       | 1.65      | -5.49       |
| F06              | 3.85       | 0.82      | -3.02       |
| F07              | 37.91      | 2.47      | -35.44      |
| F08              | 6.59       | 0.55      | -6.04       |
| FX9              | 2.75       | 7.40      | 4.65        |
| F10              | 37.36      | 14.01     | -23.35      |
| F11              | 30.22      | 0.55      | -29.67      |
| F12              | 23.63      | 6.59      | -17.03      |
| F13              | 64.56      | 28.57     | -35.99      |
| F14              | 18.41      | 3.57      | -14.84      |
| F15              | 2.47       | 0.55      | -1.92       |
| F16              | 2.96       | 0.00      | -2.96       |
| F17              | 48.63      | 26.37     | -22.25      |
| F18              | 6.04       | 1.10      | -4.95       |
| F19              | 4.81       | 4.12      | -0.69       |
| F20              | 18.68      | 10.16     | -8.52       |
| F21              | 2.75       | 1.37      | -1.37       |
| MX1 <sup>3</sup> | 1.10       | 0.27      | -0.82       |
| MX2              | 42.86      | 8.79      | -34.07      |
| M03              | 7.69       | 4.67      | -3.02       |
| M04 <sup>1</sup> | 26.65      | 0.82      | -25.82      |
| M05              | 4.12       | 3.02      | -1.10       |
| M06              | 4.95       | 1.10      | -3.85       |
| M07              | 17.03      | 13.46     | -3.57       |
| M08              | 66.76      | 18.13     | -48.63      |
| M09              | 50.27      | 2.47      | -47.80      |
| M10 <sup>2</sup> | 85.99      | 7.69      | -78.30      |
| M11              | 47.80      | 0.27      | -47.53      |
| M12              | 3.02       | 0.55      | -2.47       |
| M13              | 1.65       | 2.47      | 0.82        |

|               |               |             |        |
|---------------|---------------|-------------|--------|
| M14           | 7.14          | 1.37        | -5.77  |
| M15           | 15.11         | 15.66       | 0.55   |
| M16           | 17.58         | 3.02        | -14.56 |
| M17           | 2.75          | 2.75        | 0.00   |
| M18           | 3.57          | 1.37        | -2.20  |
| M19           | 43.96         | 11.81       | -32.14 |
| M20           | 49.73         | 10.44       | -39.29 |
| <i>M (SD)</i> | 20.65 (21.90) | 5.74 (7.01) | -14.91 |

**Table S5.** Average neutral ratings (%) by talker and speaking style.

| <b>Talker ID</b> | <b>CON</b> | <b>CL</b> | <b>Diff</b> |
|------------------|------------|-----------|-------------|
| F01              | 37.91      | 8.79      | -29.12      |
| F02              | 21.98      | 25.55     | 3.57        |
| F03 <sup>1</sup> | 64.84      | 67.03     | 2.20        |
| F04              | 53.02      | 48.08     | -4.95       |
| F05              | 40.11      | 17.86     | -22.25      |
| F06              | 45.05      | 35.16     | -9.89       |
| F07              | 35.71      | 21.98     | -13.74      |
| F08              | 47.53      | 14.01     | -33.52      |
| FX9              | 49.45      | 35.80     | -13.65      |
| F10              | 46.15      | 56.87     | 10.71       |
| F11              | 42.58      | 20.88     | -21.70      |
| F12              | 44.78      | 63.74     | 18.96       |
| F13              | 20.88      | 36.81     | 15.93       |
| F14              | 36.54      | 33.52     | -3.02       |
| F15              | 53.30      | 57.14     | 3.85        |
| F16              | 52.07      | 10.71     | -41.36      |
| F17 <sup>3</sup> | 15.11      | 18.13     | 3.02        |
| F18              | 46.70      | 18.96     | -27.75      |
| F19              | 27.56      | 22.80     | -4.76       |
| F20              | 63.74      | 43.13     | -20.60      |
| F21              | 49.18      | 34.62     | -14.56      |
| MX1              | 31.59      | 29.95     | -1.65       |
| MX2              | 39.56      | 46.15     | 6.59        |

|                  |               |               |        |
|------------------|---------------|---------------|--------|
| M03              | 60.16         | 42.31         | -17.86 |
| M04              | 54.67         | 15.66         | -39.01 |
| M05              | 60.71         | 48.63         | -12.09 |
| M06              | 61.54         | 22.53         | -39.01 |
| M07              | 59.34         | 57.69         | -1.65  |
| M08              | 19.23         | 31.04         | 11.81  |
| M09              | 28.85         | 19.51         | -9.34  |
| M10              | 8.79          | 45.88         | 37.09  |
| M11              | 40.38         | 37.36         | -3.02  |
| M12 <sup>2</sup> | 68.13         | 15.38         | -52.75 |
| M13              | 62.09         | 53.30         | -8.79  |
| M14              | 68.13         | 30.22         | -37.91 |
| M15              | 58.79         | 53.85         | -4.95  |
| M16              | 58.52         | 70.60         | 12.09  |
| M17              | 69.51         | 59.07         | -10.44 |
| M18              | 64.56         | 53.30         | -11.26 |
| M19              | 36.81         | 29.40         | -7.42  |
| M20              | 29.67         | 56.04         | 26.37  |
| <i>M (SD)</i>    | 45.74 (15.84) | 36.82 (17.07) | -8.92  |

<sup>1</sup> Reference talker with the highest rank of each perceived emotion

<sup>2</sup> Reference talker with the middle rank of each perceived emotion

<sup>3</sup> Reference talker with the lowest rank of each perceived emotion
